# Supplementary material for: Excellent intrinsic Chern insulators: monolayer PdTaX2 (X = Se, Te)
Source: Royal Society of Chemistry journal article supplement (doi:10.1039/d3tc04120d), 2024-01-01
Supplement: d3tc04120d1.pdf [file d3tc04120d1.pdf]

Electronic Supplementary Information for

## Excellent Intrinsic Chern insulators: Monolayer PdTaX<sub>2</sub> (X=Se, Te)

Shenda He,<sup>1</sup> Ruirong Kang,<sup>1</sup> Pan Zhou,<sup>2,\*</sup> Pengbo Lyu,<sup>1</sup> and Lizhong Sun<sup>1,†</sup>

<sup>1</sup>Hunan Provincial Key laboratory of Thin Film Materials and Devices,  
School of Materials Science and Engineering, Xiangtan University, Xiangtan 411105, China

<sup>2</sup>Key Laboratory of Low-dimensional Materials and Application Technology,  
School of Materials Science and Engineering, Xiangtan University, Xiangtan 411105, China

(Dated: February 15, 2024)

\* Electronic address: zhoupan71234@126.com

† Electronic address: lzsun@xtu.edu.cn

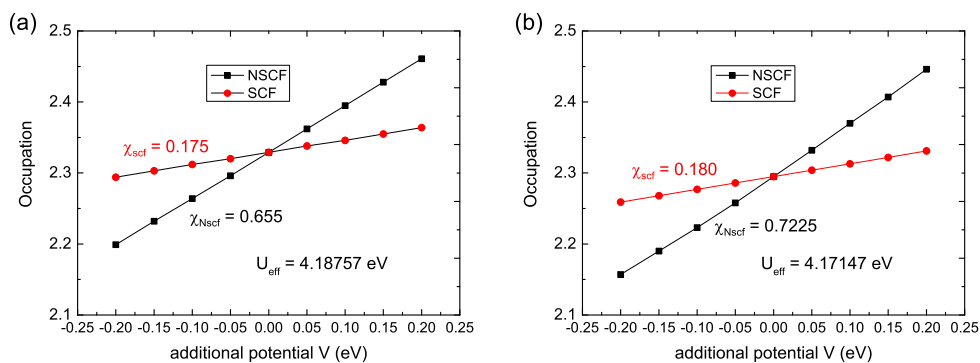

Figure S1: The  $U_{eff}$  for Ta in PdTaSe<sub>2</sub> and PdTaTe<sub>2</sub> monolayers.

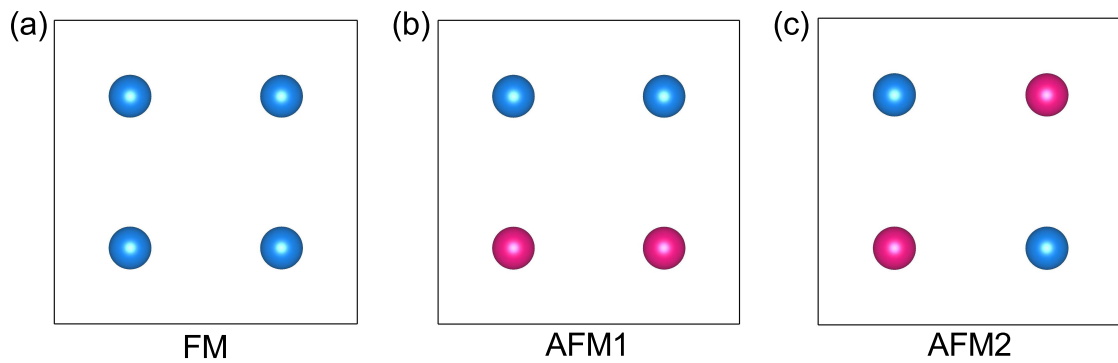

Figure S2: The different magnet configurations we employed to test the ground state, in which the  $2 \times 2 \times 1$  supercell is used. The blue and purple represent the spin up or spin down Ta atoms, respectively.

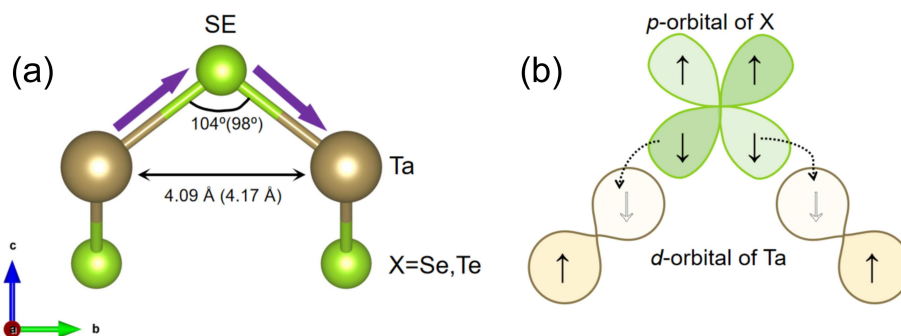

Figure S3: (a) The schematic diagram of the super-exchange (SE, Purple arrow), in which X atom represent Se or Te atoms. The angle and distance of Ta-Se-Ta(Ta-Te-Ta) is  $104^\circ(98^\circ)$  and  $4.09(4.17)$  Å. (b) Schematic diagram of the electrons hopping between X and Ta atoms.

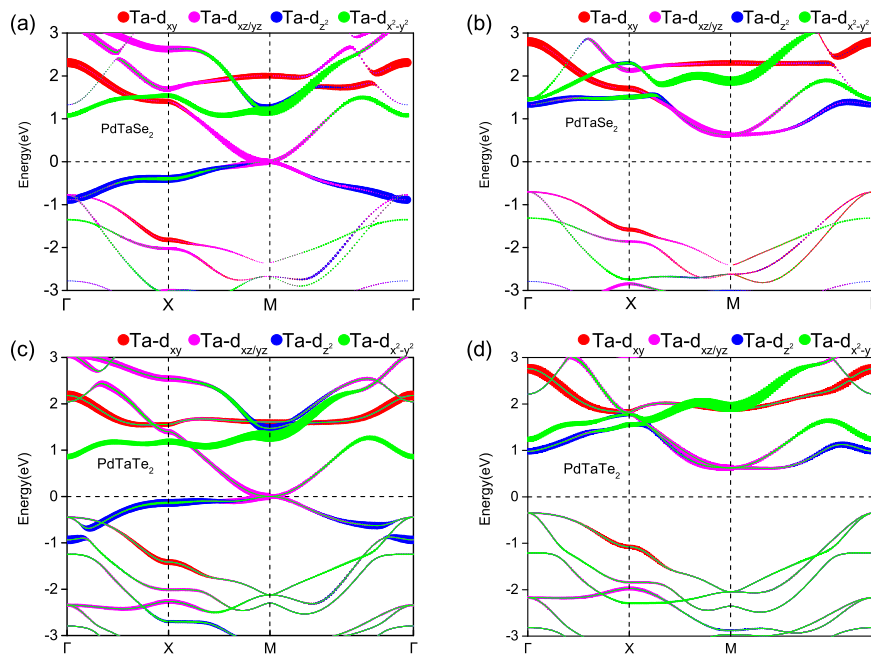

Figure S4: The orbital resolved band structures of PdTaSe<sub>2</sub> and PdTaTe<sub>2</sub> monolayers, respectively. (a) and (b) are the spin-up and spin-down channel for the d orbitals of Ta for PdTaSe<sub>2</sub>, while (c) and (d) depict the corresponding channels for PdTaTe<sub>2</sub>.

Table S1: The Bader charge transfer of the two monolayers.

| Elements            | Pd       | Ta       | Se       |
|---------------------|----------|----------|----------|
| PdTaSe <sub>2</sub> | +0.479 e | -1.681 e | +0.601 e |
| PdTaTe <sub>2</sub> | +0.667 e | -1.473 e | +0.403 e |

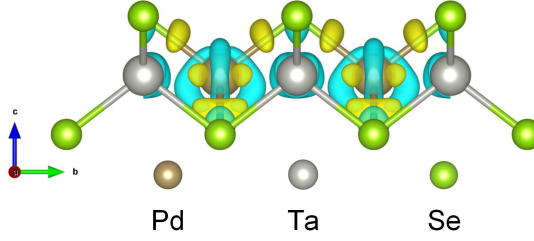Figure S5: Differential charge density of PdTaSe<sub>2</sub>, where yellow(blue) represents gained(lost) electrons.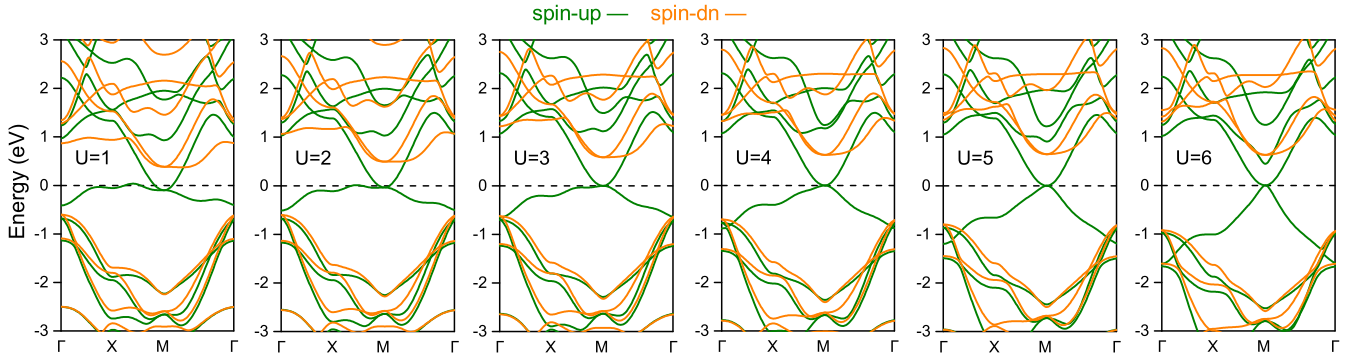Figure S6: The band structures with the  $U_{eff}$  from 1 to 6 eV for PdTaSe<sub>2</sub>. All of the  $E_f$  are set to zero.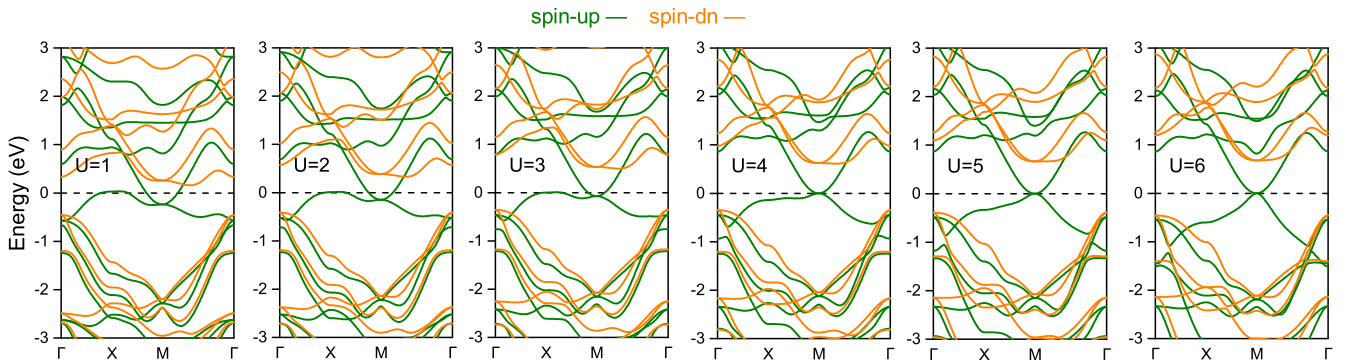Figure S7: The band structures with the  $U_{eff}$  from 1 to 6 eV for PdTaTe<sub>2</sub>. All of the  $E_f$  are set to zero.

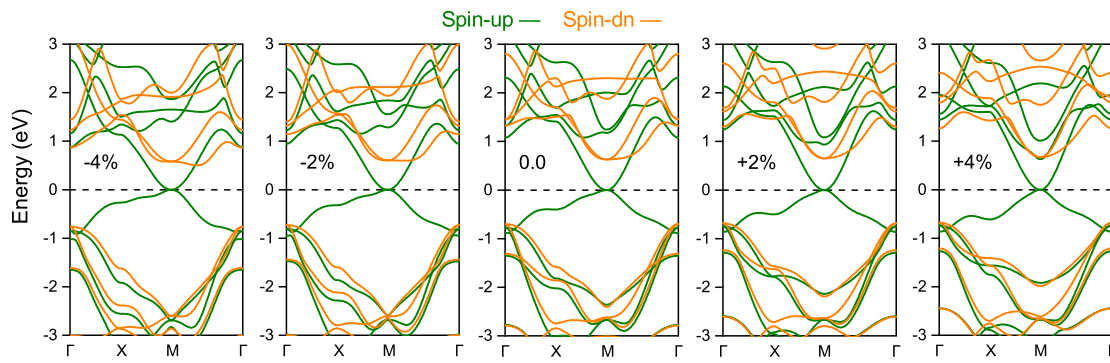

Figure S8: The band structures of PdTaSe<sub>2</sub> monolayer under biaxial strains ranging from  $-4\%$  to  $+4\%$ . All of the  $E_f$  are set to zero.

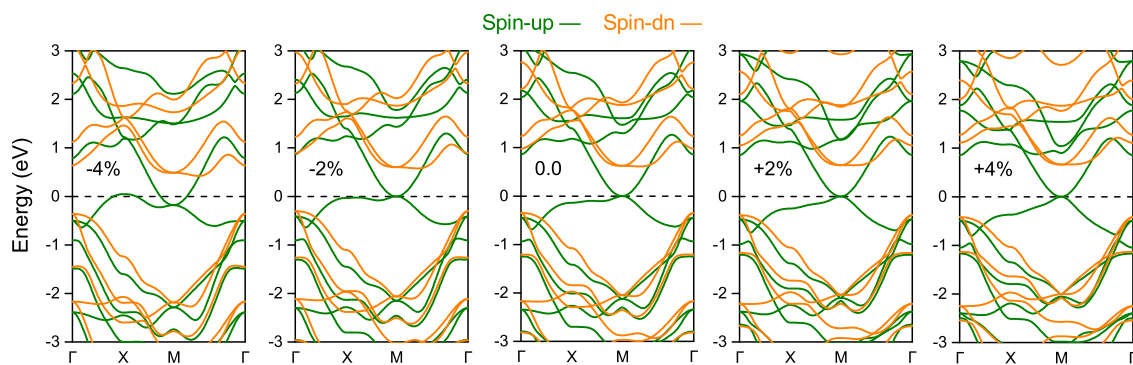

Figure S9: The figures present the band structures of PdTaTe<sub>2</sub> monolayer under biaxial strains ranging from  $-4\%$  to  $+4\%$ . All of the  $E_f$  are set to zero.

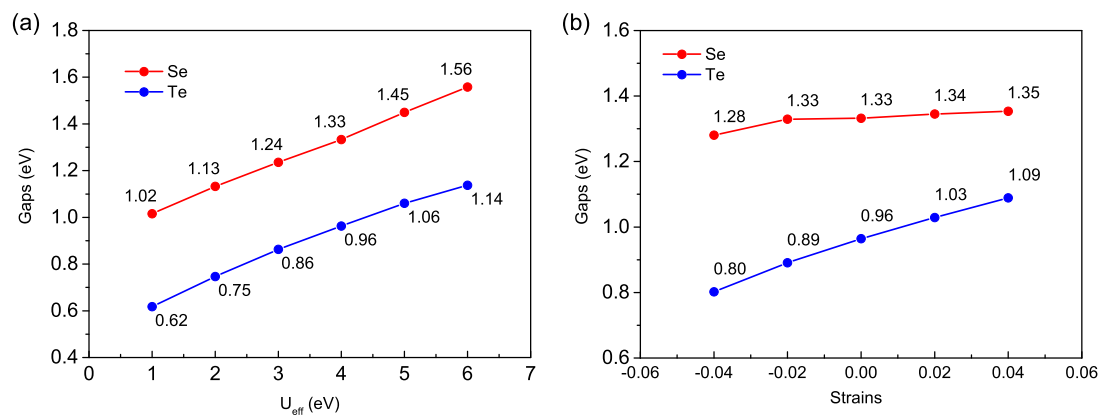

Figure S10: The spin gaps of the spin down channel for PdTaSe<sub>2</sub> (in red) and PdTaTe<sub>2</sub> (in blue) with different values of  $U_{eff}$  or a range of biaxial strains.

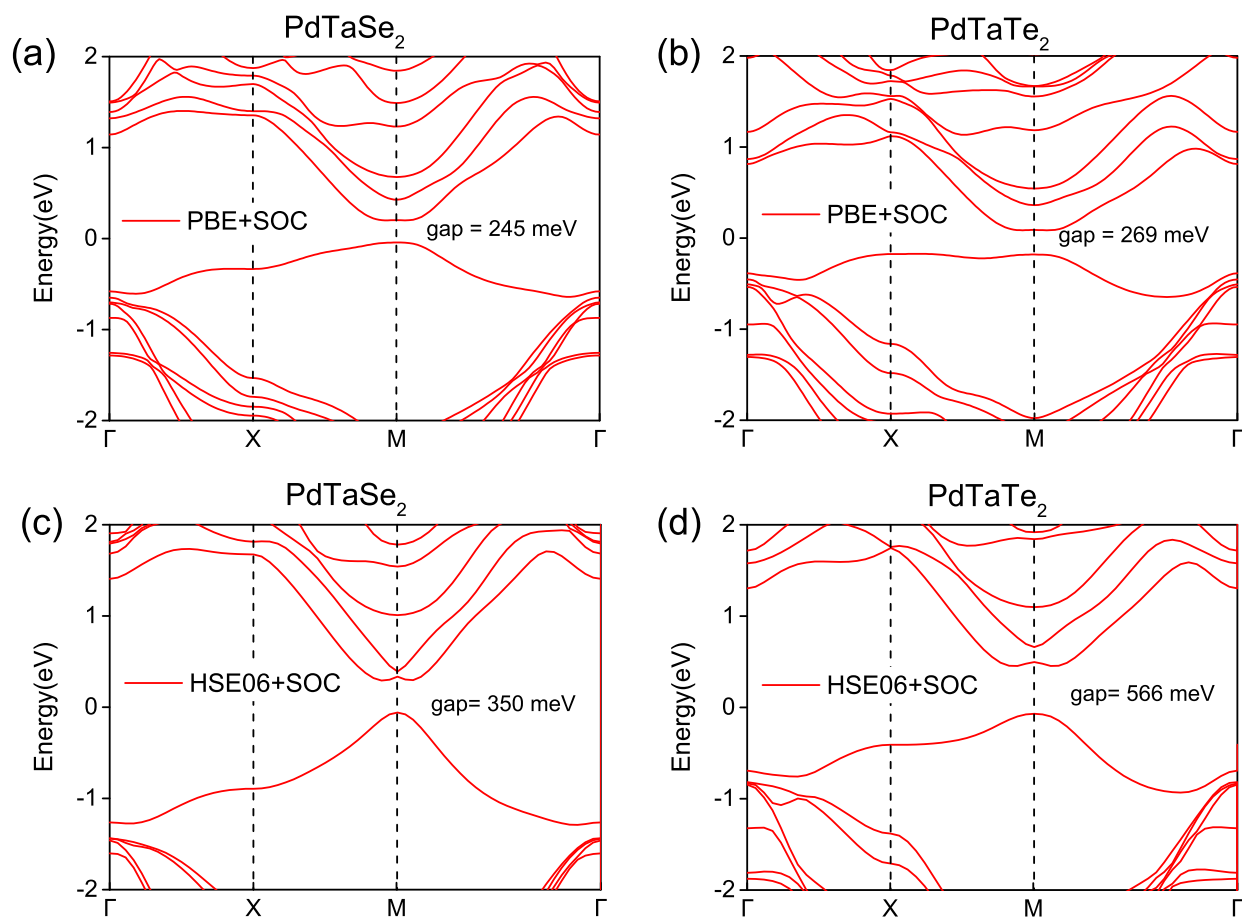

Figure S11: The orbital resolved band structures of PdTaSe<sub>2</sub> and PdTaTe<sub>2</sub> monolayers, respectively. (a) and (b) are the spin-up and spin-down channels for the d orbitals of Ta for PdTaSe<sub>2</sub>, while (c) and (d) depict the corresponding channels for PdTaTe<sub>2</sub>.

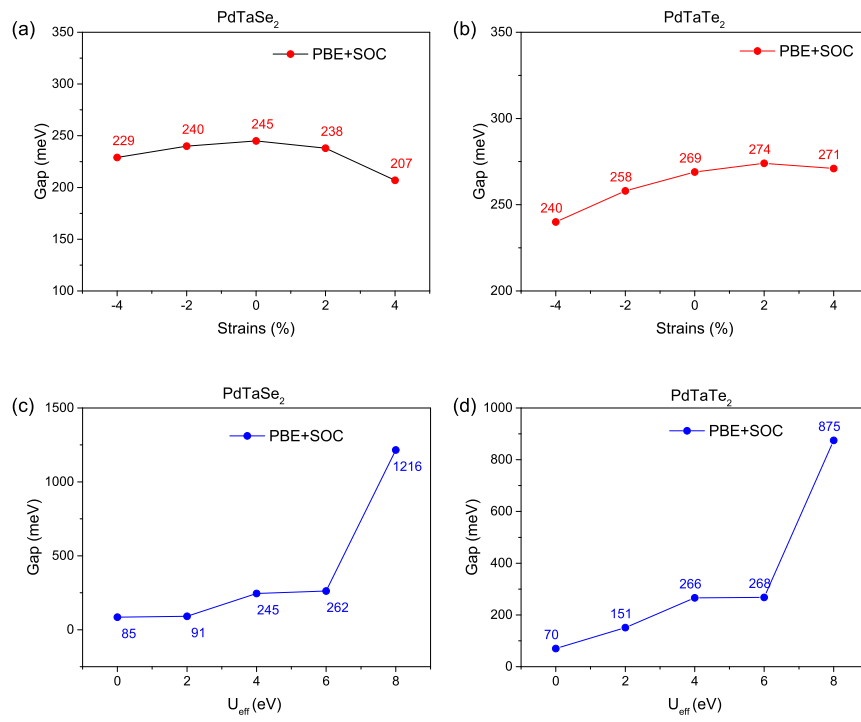

Figure S12: (a) and (b) depict the band gaps for PdTaSe<sub>2</sub> and PdTaTe<sub>2</sub> under strains ranging from -4% to 4% with spin-orbit coupling (SOC). In (c) and (d), the band gaps for these materials are presented under various  $U_{eff}$  values.

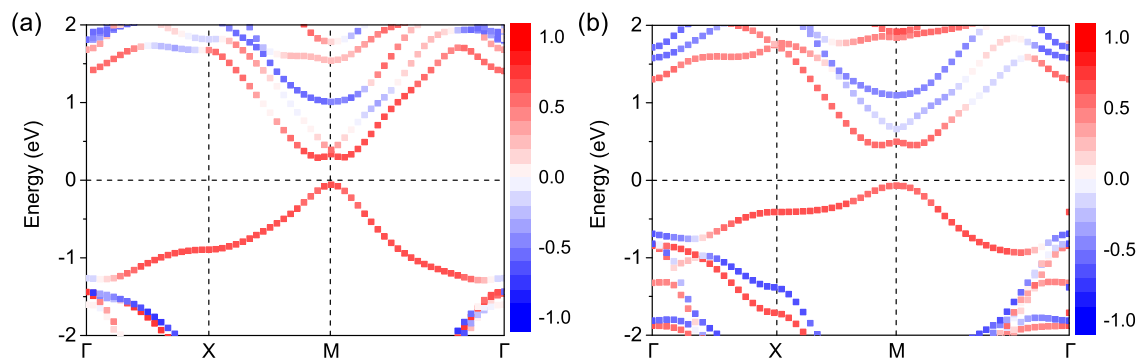

Figure S13: (a) and (b) are the normalized spin-resolved band structures of the PdTaSe<sub>2</sub> and PdTaTe<sub>2</sub> monolayers obtained by HSE06 functional in the presence of SOC, with the easy magnetization direction of the  $z$  axis.

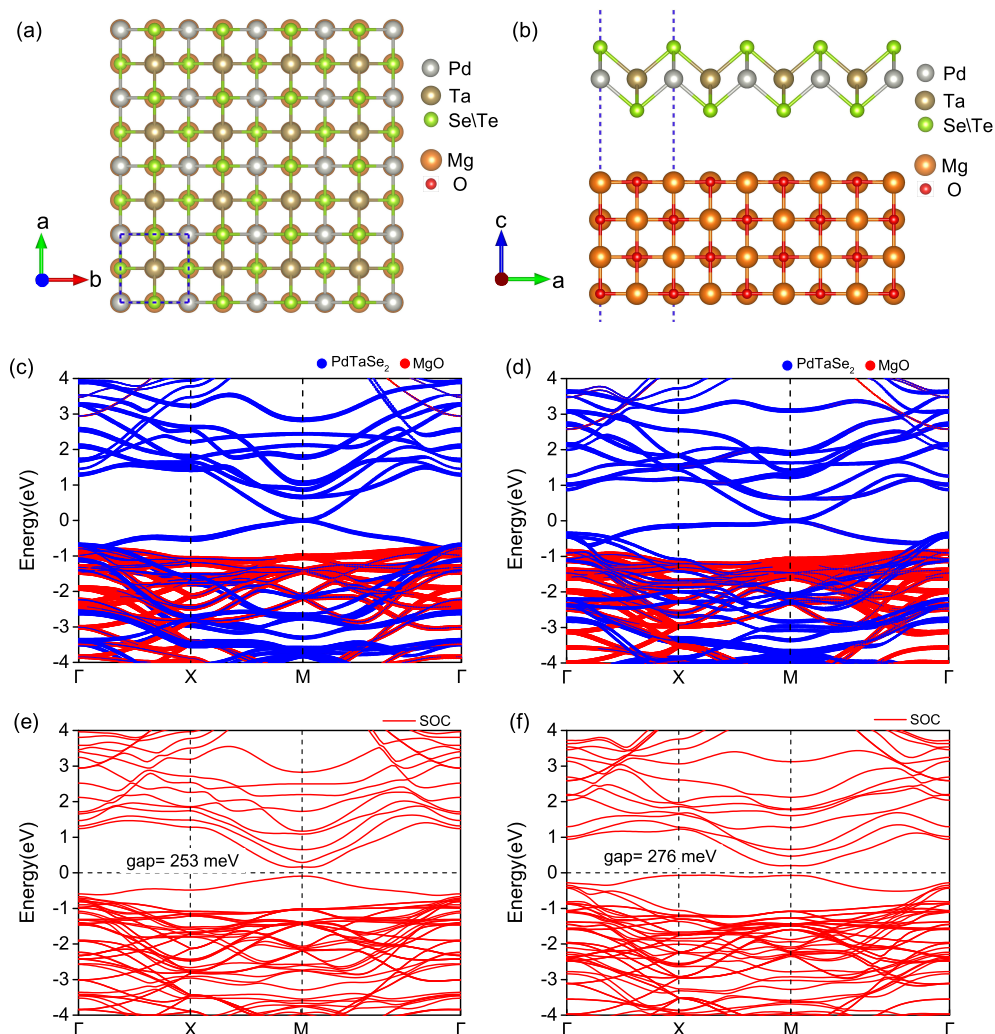

Figure S14: (a) and (b) are the top and side views of the equilibrium adsorption structure for the two monolayers adsorbed on a reconstructed MgO-(001) surface. The interlayer spaces for PdTaSe<sub>2</sub>/MgO and PdTaTe<sub>2</sub>/MgO are measured to be 3.63 Å and 4.08 Å, respectively. Band structures without spin-orbit coupling (SOC) are shown in (c) and (d) for PdTaSe<sub>2</sub>/MgO and PdTaTe<sub>2</sub>/MgO, while (e) and (f) display the band structures with SOC considered.

Table S2: The comparison of some previously proposed 2D FM materials with ours.  $T_c$  is Curie temperature. TG or T denotes whether the gap type is topological and global or topological but not global. The calculation or fabrication methods are also listed for each materials. (ME: Mechanical exfoliation, MBE: molecular beam epitaxy, SF: self-flux method)

| Materials                                                           | $T_c$ | gap | TG or T | QAHE | methods | ref.                                   |
|---------------------------------------------------------------------|-------|-----|---------|------|---------|----------------------------------------|
| CrI <sub>3</sub>                                                    | 45    | /   | /       | N    | ME      | Comput. Mater. Sci. 197, 110638 (2021) |
| CrGeTe <sub>3</sub>                                                 | 30    | /   | /       | N    | ME      | Nature 546, 265 (2017)                 |
| Fe <sub>5</sub> GeTe <sub>2</sub>                                   | 280   | /   | /       | N    | ME      | ACS nano 13, 4436 (2019).              |
| VSe <sub>2</sub> /MoS <sub>2</sub>                                  | 300   | /   | /       | N    | MBE     | Nanotechnol. 13, 289 (2018).           |
| Cr <sub>3</sub> Te <sub>4</sub>                                     | 344   | /   | /       | N    | MBE     | Adv. Mater. 33, 2103360 (2021)         |
| Fe <sub>3</sub> GaTe <sub>2</sub>                                   | 380   | /   | /       | N    | SF      | Nat. Commun. 13, 5067 (2022)           |
| GaFeSe                                                              | 1280  | /   | /       | N    | DFT     | Phys. Rev. B 106, 125404 (2022)        |
| InFeSe                                                              | 1028  | 403 | TG      | Y    | DFT     | Phys. Rev. B 106, 125404 (2022)        |
| TlFeSe                                                              | 980   | /   | /       | N    | DFT     | Phys. Rev. B 106, 125404 (2022)        |
| MnBi <sub>2</sub> Se <sub>4</sub> /Bi <sub>2</sub> Se <sub>3</sub>  | >300  | 100 | TG      | Y    | MBE     | Nano Lett. 17, 3493 (2017).            |
| (Bi <sub>0.8</sub> Mn <sub>0.2</sub> ) <sub>2</sub> Se <sub>3</sub> | 12    | 16  | TG      | Y    | DFT     | Phys. Rev. Lett. 109, 076801 (2012).   |
| Co <sub>3</sub> Pb <sub>3</sub> Se <sub>2</sub>                     | 42    | 77  | TG      | Y    | DFT     | Phys. Rev. B 103, 014410 (2021).       |
| Pb <sub>3</sub> Pt <sub>2</sub> Cl <sub>9</sub>                     | 248   | 100 | TG      | Y    | DFT     | Phys. Rev. B 104, 205401 (2021)        |
| TiTe                                                                | 650   | 309 | TG      | Y    | DFT     | Nano Lett. 22, 5379 (2022).            |
| LiFeSe                                                              | 1500  | 35  | TG      | Y    | DFT     | Phys. Rev. Lett. 125, 086401 (2020)    |
| Fe <sub>2</sub> I <sub>2</sub> Br                                   | 403   | 260 | TG      | Y    | DFT     | Nanoscale 13, 12956 (2021)             |
| Fe <sub>2</sub> I <sub>2</sub> Cl                                   | 429   | 223 | TG      | Y    | DFT     | Nanoscale 13, 12956 (2021)             |
| FeBr                                                                | 417   | 166 | TG      | Y    | DFT     | J. Mater. Chem. C 10, 8381 (2022).     |
| FeS                                                                 | /     | 628 | T       | Y    | DFT     | Nat. Commun. 13, 919 (2022).           |
| FeSe                                                                | /     | 798 | T       | Y    | DFT     | Nat. Commun. 13, 919 (2022).           |
| PdTaSe <sub>2</sub>                                                 | 1049  | 334 | TG      | Y    | DFT     | /                                      |
| PdTaTe <sub>2</sub>                                                 | 1003  | 692 | TG      | Y    | DFT     | /                                      |
